# Supplementary material for: Cost-Efficient Detection of NTRK1/2/3 Gene Fusions: Single-Center Analysis of 8075 Tumor Samples
Source: MDPI journal article supplement (doi:10.3390/ijms241814203), 2023-09-17
Supplement: s1 [file s1]

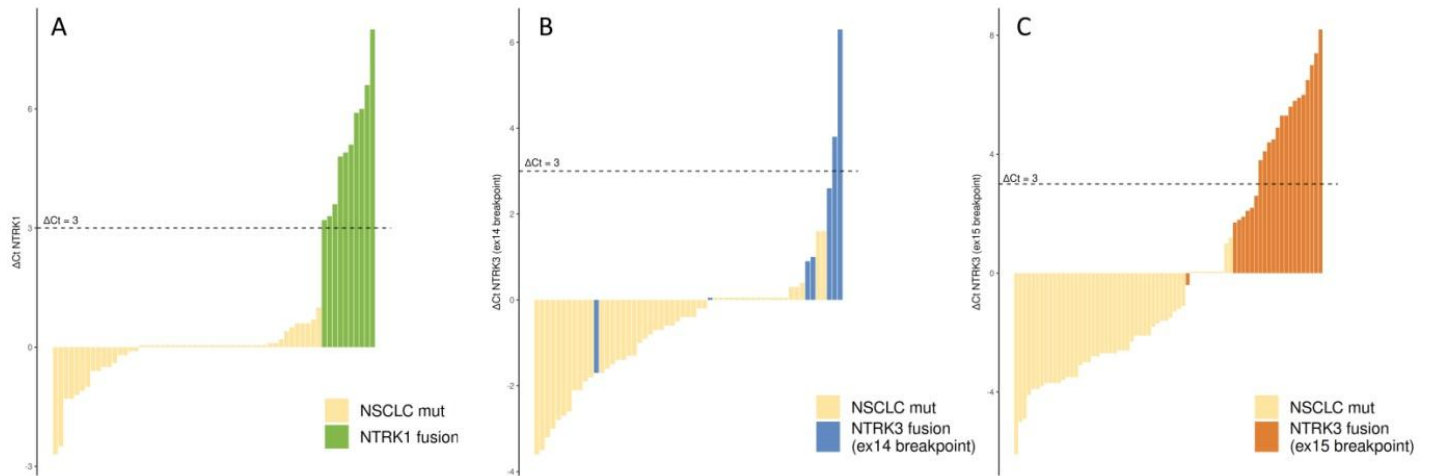

**Figure S1.** Distribution of delta Ct values obtained in unbalanced *NTRK* expression assays in *NTRK*-negative and *NTRK*-positive cases. (A) *NTRK1* 5'-3' unbalanced expression assay. (B) *NTRK3* unbalanced breakpoint (ex13-14) expression assay. (C) *NTRK3* unbalanced breakpoint (ex14-15) expression assay. The same type of analysis was not performed for *NTRK2* due to low number of cases with *NTRK2* fusions. NSCLC mut – tumors with driver alterations affecting *EGFR*, *ALK*, *RET*, *ROS1* or *MET* genes (n = 50), which are highly unlikely to carry *NTRK* translocations due to mutually exclusive nature of these events.

**Table S1. Histological types of salivary gland carcinomas and sarcomas**

| <b>Adult tumors</b>      |                                                            |                       |                                       |                                  |
|--------------------------|------------------------------------------------------------|-----------------------|---------------------------------------|----------------------------------|
| <b>Diagnosis</b>         | <b>Histological type</b>                                   | <b>Total cases, n</b> | <b>Cases with good quality RNA, n</b> | <b>Cases with NTRK fusion, n</b> |
| Salivary gland carcinoma | adenocarcinoma, NOS                                        | 47                    | 41                                    | 2                                |
| Salivary gland carcinoma | salivary duct carcinoma                                    | 18                    | 17                                    | 2                                |
| Salivary gland carcinoma | adenoid cystic carcinoma                                   | 11                    | 8                                     | 0                                |
| Salivary gland carcinoma | carcinoma ex pleomorphic adenoma                           | 8                     | 7                                     | 0                                |
| Salivary gland carcinoma | squamous cell carcinoma                                    | 5                     | 4                                     | 0                                |
| Salivary gland carcinoma | epithelial-myoeptithelial carcinoma                        | 4                     | 3                                     | 0                                |
| Salivary gland carcinoma | acinic cell carcinoma                                      | 2                     | 2                                     | 0                                |
| Salivary gland carcinoma | mucoepidermoid carcinoma                                   | 2                     | 2                                     | 0                                |
| Salivary gland carcinoma | secretory carcinoma (mammary analogue secretory carcinoma) | 2                     | 2                                     | 1                                |
| Salivary gland carcinoma | basal cell adenocarcinoma                                  | 1                     | 1                                     | 0                                |
| Salivary gland carcinoma | carcinosarcoma                                             | 1                     | 1                                     | 0                                |
| Salivary gland carcinoma | clear cell carcinoma                                       | 1                     | 1                                     | 0                                |
| Sarcoma                  | sarcoma, NOS                                               | 29                    | 28                                    | 0                                |
| Sarcoma                  | leiomyosarcoma                                             | 19                    | 18                                    | 0                                |
| Sarcoma                  | liposarcoma                                                | 13                    | 12                                    | 0                                |
| Sarcoma                  | Ewing sarcoma                                              | 10                    | 8                                     | 0                                |
| Sarcoma                  | chondroblastic osteosarcoma                                | 8                     | 6                                     | 0                                |
| Sarcoma                  | malignant peripheral nerve sheath tumor (MPNST)            | 6                     | 5                                     | 0                                |
| Sarcoma                  | synovial sarcoma                                           | 6                     | 5                                     | 0                                |
| Sarcoma                  | endometrial stromal sarcoma                                | 5                     | 5                                     | 0                                |
| Sarcoma                  | rhabdomyosarcoma, NOS                                      | 4                     | 3                                     | 0                                |
| Sarcoma                  | fibrosarcoma                                               | 3                     | 3                                     | 0                                |
| Sarcoma                  | osteosarcoma                                               | 3                     | 0                                     | 0                                |
| Sarcoma                  | undifferentiated pleomorphic sarcoma                       | 3                     | 2                                     | 0                                |
| Sarcoma                  | embryonal rhabdomyosarcoma                                 | 2                     | 2                                     | 0                                |
| Sarcoma                  | myxofibrosarcoma (MFS)                                     | 2                     | 2                                     | 0                                |
| Sarcoma                  | Ewing-like sarcoma                                         | 1                     | 1                                     | 0                                |
| Sarcoma                  | alveolar rhabdomyosarcoma                                  | 1                     | 1                                     | 0                                |
| Sarcoma                  | clear cell sarcoma                                         | 1                     | 1                                     | 0                                |

|                          |                                                 |   |   |   |
|--------------------------|-------------------------------------------------|---|---|---|
| Sarcoma                  | hemangioendothelioma                            | 1 | 1 | 0 |
| Sarcoma                  | spindle cell sarcoma                            | 1 | 1 | 0 |
| <b>Pediatric tumors</b>  |                                                 |   |   |   |
| Salivary gland carcinoma | adenocarcinoma, NOS                             | 2 | 2 | 0 |
| Salivary gland carcinoma | adenoid cystic carcinoma                        | 1 | 1 | 0 |
| Salivary gland carcinoma | epithelial-myoeptithelial carcinoma             | 1 | 1 | 0 |
| Sarcoma                  | Ewing sarcoma                                   | 8 | 4 | 0 |
| Sarcoma                  | sarcoma, NOS                                    | 8 | 8 | 2 |
| Sarcoma                  | alveolar rhabdomyosarcoma                       | 6 | 6 | 0 |
| Sarcoma                  | malignant peripheral nerve sheath tumor (MPNST) | 5 | 5 | 1 |
| Sarcoma                  | infantile fibrosarcoma                          | 3 | 3 | 2 |
| Sarcoma                  | rhabdomyosarcoma, NOS                           | 3 | 2 | 0 |
| Sarcoma                  | dermatofibrosarcoma protuberans (DFSP)          | 2 | 2 | 1 |
| Sarcoma                  | embryonal rhabdomyosarcoma                      | 2 | 2 | 0 |
| Sarcoma                  | osteosarcoma                                    | 2 | 0 | 0 |
| Sarcoma                  | synovial sarcoma                                | 2 | 2 | 0 |
| Sarcoma                  | angiosarcoma                                    | 1 | 1 | 0 |
| Sarcoma                  | clear cell sarcoma                              | 1 | 1 | 0 |
| Sarcoma                  | hemangioendothelioma                            | 1 | 1 | 1 |
| Sarcoma                  | liposarcoma                                     | 1 | 1 | 0 |
| Sarcoma                  | spindle cell rhabdomyosarcoma                   | 1 | 1 | 0 |

**Table S2. Primers and probes used for unbalanced NTRK expression testing**

|                  |                                        |
|------------------|----------------------------------------|
| <b>SDHA</b>      |                                        |
| SDHA F           | CCACTCGCTATTGCACACC                    |
| SDHA R           | ATCCAAGGCAAAATACTCCAC                  |
| SDHA P           | [R6G]CTGGTATCATATCGCAGAGACC[BHQ2]      |
| <b>NTRK1</b>     |                                        |
| NTRK1 ex 3 F     | GCCTTCCATTTCACTCCTCG                   |
| NTRK1 ex 4 R     | GAGAGAGACTCCAGAGCGT                    |
| NTRK1 ex 3-4 P   | [FAM]TCAGTCGCCTGAATCTCTCCTTCAAC[BHQ1]  |
| NTRK1 ex 14 F    | GCTCATGGTCTTTGAGTATATGCG               |
| NTRK1 ex 15 R    | AGCTTGGCATCAGGTCCATG                   |
| NTRK1 ex 14-15 P | [JOE]ATCGGAGGAAGCGGTTGAGGTC[BHQ1]      |
| <b>NTRK2</b>     |                                        |
| NTRK2 ex 11 F    | AATGAAATCCCTTCCACAGACG                 |
| NTRK2 ex 12 R    | CCACCACAGACGCAATCAC                    |
| NTRK2 ex 11-12 P | [FAM]AACATCTCTCGGTCTATGCTGTGGT[BHQ1]   |
| NTRK2 ex 15 F    | GAATGCTATAACCTCTGTCCTGAG               |
| NTRK2 ex 16 R    | CACGGTGGAAGTCCTTGC                     |
| NTRK2 ex 15-16 P | [CY35]TTCAGGGTCTTCACTGCCACCAAGAT[BHQ2] |
| <b>NTRK3</b>     |                                        |
| NTRK3 ex 13 F    | GGTTCTCTTCGTCATGATCAAC                 |
| NTRK3 ex 14 R    | CCTCCTCACCCTGATGAC                     |
| NTRK3 ex 13-14 P | [FAM]TTTGGAATGAAGGGTCCCGTGGCT[BHQ1]    |
| NTRK3 ex 14 F    | CCAGTACTTCCGTCAGGGAC                   |
| NTRK3 ex 15 R    | GTCTCTCCTCTTAATGTGCTGC                 |
| NTRK3 ex 14-15 P | [ROX]AACTGCCACAAGCCGGACACGTATG[BHQ2]   |
| NTRK3 ex 16 F    | AATACATGAAGCATGGAGACC                  |
| NTRK3 ex 17 R    | CACAAGGATCATTCATCTGG                   |
| NTRK3 ex 16-17 P | [JOE]CATGGGCCCTGAGGAACTTATT[BHQ1]      |

**Table S3. Primers and probes used for variant-specific PCR**

| #                     | Breakpoint | Oligo name         | Strand  | Sequence                              | Fragment size |
|-----------------------|------------|--------------------|---------|---------------------------------------|---------------|
| <b>NTRK1 variants</b> |            |                    |         |                                       |               |
| <b>LMNA::NTRK1</b>    |            |                    |         |                                       |               |
| 1                     | (L3;N10)   | LMNA ex 3 F        | Forward | ACTTCCAGAAGAACATCTACAGTG              | 75            |
|                       |            | LMNA-NTRK1 ex 10 R | Reverse | GGTGTTTCGTCCTTCTTCTCC                 |               |
|                       |            | LMNA-NTRK1 P1      | Probe   | [FAM]ACACTAACAGCACATCTGGAGACCCG[BHQ1] |               |
| 2                     | (L3;N11)   | LMNA ex 3 F        | Forward | ACTTCCAGAAGAACATCTACAGTG              | 69            |
|                       |            | LMNA-NTRK1 ex 11 R | Reverse | GGAAGAGGCAGGCAAAGAC                   |               |
|                       |            | LMNA-NTRK1 P2      | Probe   | [FAM]TCTCGGTGGCTGTGGGCCTG[BHQ1]       |               |
| 3                     | (L3;N12)   | LMNA ex 3 F        | Forward | ACTTCCAGAAGAACATCTACAGTG              | 78            |
|                       |            | LMNA-NTRK1 ex 12 R | Reverse | ATGAAATGCAGGGACATGGC                  |               |
|                       |            | LMNA-NTRK1 P3      | Probe   | [FAM]CTGTGCTGGCTCCAGAGGATGGG[BHQ1]    |               |
| 4                     | (L4;N10)   | LMNA ex 4 F        | Forward | GCTGGAGAAGACTTATTCTGCC                | 74            |
|                       |            | LMNA-NTRK1 ex 10 R | Reverse | GGTGTTTCGTCCTTCTTCTCC                 |               |
|                       |            | LMNA-NTRK1 P1      | Probe   | [FAM]ACACTAACAGCACATCTGGAGACCCG[BHQ1] |               |
| 5                     | (L4;N11)   | LMNA ex 4 F        | Forward | GCTGGAGAAGACTTATTCTGCC                | 68            |
|                       |            | LMNA-NTRK1 ex 11 R | Reverse | GGAAGAGGCAGGCAAAGAC                   |               |
|                       |            | LMNA-NTRK1 P2      | Probe   | [FAM]TCTCGGTGGCTGTGGGCCTG[BHQ1]       |               |
| 6                     | (L4;N12)   | LMNA ex 4 F        | Forward | GCTGGAGAAGACTTATTCTGCC                | 77            |
|                       |            | LMNA-NTRK1 ex 12 R | Reverse | ATGAAATGCAGGGACATGGC                  |               |
|                       |            | LMNA-NTRK1 P3      | Probe   | [FAM]CTGTGCTGGCTCCAGAGGATGGG[BHQ1]    |               |
| 7                     | (L8;N10)   | LMNA ex 8 F        | Forward | CCACCAAAGTTCACCCTGAAG                 | 88            |
|                       |            | LMNA-NTRK1 ex 10 R | Reverse | GGTGTTTCGTCCTTCTTCTCC                 |               |
|                       |            | LMNA-NTRK1 P1      | Probe   | [FAM]ACACTAACAGCACATCTGGAGACCCG[BHQ1] |               |
| 8                     | (L8;N11)   | LMNA ex 8 F        | Forward | CCACCAAAGTTCACCCTGAAG                 | 82            |
|                       |            | LMNA-NTRK1 ex 11 R | Reverse | GGAAGAGGCAGGCAAAGAC                   |               |
|                       |            | LMNA-NTRK1 P2      | Probe   | [FAM]TCTCGGTGGCTGTGGGCCTG[BHQ1]       |               |
| 9                     | (L8;N12)   | LMNA ex 8 F        | Forward | CCACCAAAGTTCACCCTGAAG                 | 91            |
|                       |            | LMNA-NTRK1 ex 12 R | Reverse | ATGAAATGCAGGGACATGGC                  |               |
|                       |            | LMNA-NTRK1 P3      | Probe   | [FAM]CTGTGCTGGCTCCAGAGGATGGG[BHQ1]    |               |

|                |           |                       |         |                                         |     |
|----------------|-----------|-----------------------|---------|-----------------------------------------|-----|
| 10             | (L10;N10) | LMNA ex 10 F          | Forward | TGAGGATGGAGATGACCTGC                    | 83  |
|                |           | LMNA-NTRK1 ex 10 R    | Reverse | GGTGTTCGTCCTTCTTCTCC                    |     |
|                |           | LMNA-NTRK1 P1         | Probe   | [FAM]ACACTAACAGCACATCTGGAGACCCG[BHQ1]   |     |
| 11             | (L10;N11) | LMNA ex 10 F          | Forward | TGAGGATGGAGATGACCTGC                    | 77  |
|                |           | LMNA-NTRK1 ex 11 R    | Reverse | GGAAGAGGCAGGCAAAGAC                     |     |
|                |           | LMNA-NTRK1 P2         | Probe   | [FAM]TCTCGGTGGCTGTGGGCCTG[BHQ1]         |     |
| 12             | (L10;N12) | LMNA ex 10 F          | Forward | TGAGGATGGAGATGACCTGC                    | 86  |
|                |           | LMNA-NTRK1 ex 12 R    | Reverse | ATGAAATGCAGGGACATGGC                    |     |
|                |           | LMNA-NTRK1 P3         | Probe   | [FAM]CTGTGCTGGCTCCAGAGGATGGG[BHQ1]      |     |
| 13             | (L11;N10) | LMNA ex 11 F          | Forward | TACCTCCTGGGCAACTCC                      | 82  |
|                |           | LMNA-NTRK1 ex 10 R    | Reverse | GGTGTTCGTCCTTCTTCTCC                    |     |
|                |           | LMNA-NTRK1 P1         | Probe   | [FAM]ACACTAACAGCACATCTGGAGACCCG[BHQ1]   |     |
| 14             | (L11;N11) | LMNA ex 11 F          | Forward | TACCTCCTGGGCAACTCC                      | 76  |
|                |           | LMNA-NTRK1 ex 11 R    | Reverse | GGAAGAGGCAGGCAAAGAC                     |     |
|                |           | LMNA-NTRK1 P2         | Probe   | [FAM]TCTCGGTGGCTGTGGGCCTG[BHQ1]         |     |
| 15             | (L11;N12) | LMNA ex 11 F          | Forward | TACCTCCTGGGCAACTCC                      | 85  |
|                |           | LMNA-NTRK1 ex 12 R    | Reverse | ATGAAATGCAGGGACATGGC                    |     |
|                |           | LMNA-NTRK1 P3         | Probe   | [FAM]CTGTGCTGGCTCCAGAGGATGGG[BHQ1]      |     |
| BCAN::NTRK1    |           |                       |         |                                         |     |
| 16             | (B12;N10) | BCAN ex 12 F          | Forward | CAACTACCACCTGTCCTACAC                   | 86  |
|                |           | BCAN-NTRK1 ex 10 R    | Reverse | GTGTTTCGTCCTTCTTCTCCA                   |     |
|                |           | BCAN-NTRK1 P          | Probe   | [FAM]CACTAACAGCACATCTGGAGACC[BHQ1]      |     |
| IRF2BP2::NTRK1 |           |                       |         |                                         |     |
| 17             | (I1;N8)   | IRF2BP2 ex 1 F        | Forward | AGGCAGGTTGTTGGGTTTC                     | 118 |
|                |           | IRF2BP2-NTRK1 ex 8 R  | Reverse | ATCCACAGAGAAGGGGATGC                    |     |
|                |           | IRF2BP2-NTRK1 P       | Probe   | [FAM]ACACTAACAGCACATCTGGAGACCCG[BHQ1]   |     |
| 18             | (I1;N10)  | IRF2BP2 ex 1 F        | Forward | AGGCAGGTTGTTGGGTTTC                     | 74  |
|                |           | IRF2BP2-NTRK1 ex 10 R | Reverse | GGTCTCCAGATGTGCTGTTAG                   |     |
|                |           | IRF2BP2-NTRK1 P       | Probe   | [FAM]ACACTAACAGCACATCTGGAGACCCG[BHQ1]   |     |
| TPM3::NTRK1    |           |                       |         |                                         |     |
| 19             | (T7;N9)   | TPM3 ex 7 F           | Forward | CAAGATTCTTACTGATAAACTCAAGGAG            | 45  |
|                |           | TPM3-NTRK1 ex 9 R     | Reverse | CACCGGCGAGAAGGAGA                       |     |
|                |           | TPM3-NTRK1 P1         | Probe   | [JOE]CTTCCAGGTCATCAATTGTCTTTCCAGC[BHQ1] |     |
| 20             | (T7;N10)  | TPM3 ex 7 F           | Forward | CAAGATTCTTACTGATAAACTCAAGGAG            | 76  |

|                |           |                    |         |                                            |     |
|----------------|-----------|--------------------|---------|--------------------------------------------|-----|
|                |           | TPM3-NTRK1 ex 10 R | Reverse | GTGTTTCGTCCTTCTTCTCCA                      |     |
|                |           | TPM3-NTRK1 P3      | Probe   | [FAM]CACTAACAGCACATCTGGAGACC[BHQ1]         |     |
| 21             | (T7;N12)  | TPM3 ex 7 F        | Forward | CAAGATTCTTACTGATAAACTCAAGGAG               | 80  |
|                |           | TPM3-NTRK1 ex 12 R | Reverse | ATGAAATGCAGGGACATGGC                       |     |
|                |           | TPM3-NTRK1 P4      | Probe   | [FAM]CTGTGCTGGCTCCAGAGGATGGG[BHQ1]         |     |
| 22             | (T8;N9)   | TPM3 ex 8 F        | Forward | GAGATCGGTAGCCAAGCTG                        | 61  |
|                |           | TPM3-NTRK1 ex 9 R  | Reverse | CACCGGCGAGAAGGAGA                          |     |
|                |           | TPM3-NTRK1 P1      | Probe   | [JOE]CTTCCAGGTCATCAATTGTCTTTTCCAGC[BHQ1]   |     |
| 23             | (T8;N10)  | TPM3 ex 8 F        | Forward | GAGATCGGTAGCCAAGCTG                        | 92  |
|                |           | TPM3-NTRK1 ex 10 R | Reverse | GTGTTTCGTCCTTCTTCTCCA                      |     |
|                |           | TPM3-NTRK1 P3      | Probe   | [FAM]CACTAACAGCACATCTGGAGACC[BHQ1]         |     |
| 24             | (T8;N12)  | TPM3 ex 8 F        | Forward | GAGATCGGTAGCCAAGCTG                        | 96  |
|                |           | TPM3-NTRK1 ex 12 R | Reverse | ATGAAATGCAGGGACATGGC                       |     |
|                |           | TPM3-NTRK1 P4      | Probe   | [FAM]CTGTGCTGGCTCCAGAGGATGGG[BHQ1]         |     |
| 25             | (T9;N9)*  | TPM3 ex 9 F        | Forward | CTGGACCACGCCCTCAATG                        | 98  |
|                |           | TPM3-NTRK1 ex 10 R | Reverse | GTGTTTCGTCCTTCTTCTCCA                      |     |
|                |           | TPM3-NTRK1 P3      | Probe   | [FAM]CACTAACAGCACATCTGGAGACC[BHQ1]         |     |
| 26             | (T9;N10)* | TPM3 ex 9 F        | Forward | CTGGACCACGCCCTCAATG                        | 80  |
|                |           | TPM3-NTRK1 ex 10 R | Reverse | GTGTTTCGTCCTTCTTCTCCA                      |     |
|                |           | TPM3-NTRK1 P3      | Probe   | [FAM]CACTAACAGCACATCTGGAGACC[BHQ1]         |     |
| 27             | (T9;N12)  | TPM3 ex 9 F        | Forward | CTGGACCACGCCCTCAATG                        | 84  |
|                |           | TPM3-NTRK1 ex 12 R | Reverse | ATGAAATGCAGGGACATGGC                       |     |
|                |           | TPM3-NTRK1 P4      | Probe   | [FAM]CTGTGCTGGCTCCAGAGGATGGG[BHQ1]         |     |
| 28             | (T10;N9)  | TPM3 ex 10 F       | Forward | ATGGATTAGTACAGGTTACTCAGG                   | 110 |
|                |           | TPM3-NTRK1 ex 9 R  | Reverse | CACCGGCGAGAAGGAGA                          |     |
|                |           | TPM3-NTRK1 P2      | Probe   | [FAM]AAGGAATTTAATCTTGTTTCAGCTTGAGGAG[BHQ1] |     |
| 29             | (T10;N10) | TPM3 ex 10 F       | Forward | ATGGATTAGTACAGGTTACTCAGG                   | 141 |
|                |           | TPM3-NTRK1 ex 10 R | Reverse | GTGTTTCGTCCTTCTTCTCCA                      |     |
|                |           | TPM3-NTRK1 P2      | Probe   | [FAM]AAGGAATTTAATCTTGTTTCAGCTTGAGGAG[BHQ1] |     |
| 30             | (T10;N12) | TPM3 ex 10 F       | Forward | ATGGATTAGTACAGGTTACTCAGG                   | 145 |
|                |           | TPM3-NTRK1 ex 12 R | Reverse | ATGAAATGCAGGGACATGGC                       |     |
|                |           | TPM3-NTRK1 P2      | Probe   | [FAM]AAGGAATTTAATCTTGTTTCAGCTTGAGGAG[BHQ1] |     |
| NTRK2 variants |           |                    |         |                                            |     |
| BCR::NTRK2     |           |                    |         |                                            |     |

|                |          |                      |         |                                        |     |
|----------------|----------|----------------------|---------|----------------------------------------|-----|
| 31             | (B1;N17) | BCR ex 1 F           | Forward | GCCCAACGATGGCGAG                       | 80  |
|                |          | BCR-NTRK2 ex17 R     | Reverse | GGGTTGCCCTCAGCC                        |     |
|                |          | BCR-NTRK2 P          | Probe   | [FAM]ATGGAGACGCAGGGCACACGG[BHQ1]       |     |
| SQSTM1::NTRK2  |          |                      |         |                                        |     |
| 32             | (S5;N16) | SQSTM1 ex 5 F        | Forward | TCCGAGTGTGAATTCCTGAAG                  | 108 |
|                |          | SQSTM1-NTRK2 ex 16 R | Reverse | CACGGTGGAAGTCCTTGC                     |     |
|                |          | SQSTM1-NTRK2 P       | Probe   | [FAM]ACCCTGAAGGATGCCAGTGACAAT[BHQ1]    |     |
| 33             | (S6;N16) | SQSTM1 ex 6 F        | Forward | TCGCCTTGGAGTCCGAG                      | 81  |
|                |          | SQSTM1-NTRK2 ex 16 R | Reverse | CACGGTGGAAGTCCTTGC                     |     |
|                |          | SQSTM1-NTRK2 P       | Probe   | [FAM]ACCCTGAAGGATGCCAGTGACAAT[BHQ1]    |     |
| NTRK3 variants |          |                      |         |                                        |     |
| ETV6::NTRK3    |          |                      |         |                                        |     |
| 34             | (E4;N13) | ETV6 ex 4 F          | Forward | CATTCTTCCACCCTGGAAACTC                 | 92  |
|                |          | ETV6-NTRK3 ex 13 R   | Reverse | GCAAGTCCAAC T GCTATGGATAC              |     |
|                |          | ETV6-NTRK3 P1        | Probe   | [FAM]TTCTGATGCAGTATGACCTCCGGCTGT[BHQ1] |     |
| 35             | (E4;N14) | ETV6 ex 4 F          | Forward | CATTCTTCCACCCTGGAAACTC                 | 90  |
|                |          | ETV6-NTRK3 ex 14 R   | Reverse | CACTGATGACAGCCACGG                     |     |
|                |          | ETV6-NTRK3 P1        | Probe   | [FAM]TTCTGATGCAGTATGACCTCCGGCTGT[BHQ1] |     |
| 36             | (E4;N15) | ETV6 ex 4 F          | Forward | CATTCTTCCACCCTGGAAACTC                 | 123 |
|                |          | ETV6-NTRK3 ex 15 R   | Reverse | CCTCACCCAGTTCTCGCTT                    |     |
|                |          | ETV6-NTRK3 P1        | Probe   | [FAM]TTCTGATGCAGTATGACCTCCGGCTGT[BHQ1] |     |
| 37             | (E5;N13) | ETV6 ex 5 F          | Forward | CTGGCTTACATGAACCACATCA                 | 99  |
|                |          | ETV6-NTRK3 ex 13 R   | Reverse | GCAAGTCCAAC T GCTATGGATAC              |     |
|                |          | ETV6-NTRK3 P2        | Probe   | [FAM]TGCTATTCTCCCAATGGGCATGGCGT[BHQ1]  |     |
| 38             | (E5;N14) | ETV6 ex 5 F          | Forward | CTGGCTTACATGAACCACATCA                 | 97  |
|                |          | ETV6-NTRK3 ex 14 R   | Reverse | CACTGATGACAGCCACGG                     |     |
|                |          | ETV6-NTRK3 P2        | Probe   | [FAM]TGCTATTCTCCCAATGGGCATGGCGT[BHQ1]  |     |
| 39             | (E5;N15) | ETV6 ex 5 F          | Forward | CTGGCTTACATGAACCACATCA                 | 130 |
|                |          | ETV6-NTRK3 ex 15 R   | Reverse | CCTCACCCAGTTCTCGCTT                    |     |
|                |          | ETV6-NTRK3 P2        | Probe   | [FAM]TGCTATTCTCCCAATGGGCATGGCGT[BHQ1]  |     |
| 40             | (E6;N13) | ETV6 ex 6 F          | Forward | CCGGATAGTGGATCCCAAC                    | 72  |
|                |          | ETV6-NTRK3 ex 13 R   | Reverse | GCAAGTCCAAC T GCTATGGATAC              |     |
|                |          | ETV6-NTRK3 P3        | Probe   | [FAM]TTATGGTTTCCCCACAGTCGAGCCAGT[BHQ1] |     |
| 41             | (E6;N14) | ETV6 ex 6 F          | Forward | CCGGATAGTGGATCCCAAC                    | 70  |



|             |          |                    |         |                                        |     |
|-------------|----------|--------------------|---------|----------------------------------------|-----|
|             |          | ETV6-NTRK3 ex 14 R | Reverse | CACTGATGACAGCCACGG                     |     |
|             |          | ETV6-NTRK3 P3      | Probe   | [FAM]TTATGGTTTCCCCACAGTCGAGCCAGT[BHQ1] |     |
| 42          | (E6;N15) | ETV6 ex 6 F        | Forward | CCGGATAGTGGATCCCAAC                    | 103 |
|             |          | ETV6-NTRK3 ex 15 R | Reverse | CCTCACCCAGTTCTCGCTT                    |     |
|             |          | ETV6-NTRK3 P3      | Probe   | [FAM]TTATGGTTTCCCCACAGTCGAGCCAGT[BHQ1] |     |
| EML4::NTRK3 |          |                    |         |                                        |     |
| 43          | (E2;N13) | EML4 ex 2 F        | Forward | CTTTGGCTGATGTTTTGAGGC                  | 101 |
|             |          | EML4-NTRK3 ex 13 R | Reverse | GCAAGTCCAAGTCTATGGATAC                 |     |
|             |          | EML4-NTRK3 P       | Probe   | [FAM]TGAGACTGATTTTTTCACTGAGGCCAC[BHQ1] |     |
| 44          | (E2;N14) | EML4 ex 2 F        | Forward | CTTTGGCTGATGTTTTGAGGC                  | 99  |
|             |          | EML4-NTRK3 ex 14 R | Reverse | CACTGATGACAGCCACGG                     |     |
|             |          | EML4-NTRK3 P       | Probe   | [FAM]TGAGACTGATTTTTTCACTGAGGCCAC[BHQ1] |     |

\* fragments TPM3ex9/NTRK1ex9 and TPM3ex9/NTRK1ex10 are produced by the same primer pair and can be differentiated by fragment size

**Table S4. List of transcripts utilized for primer design**

| Gene    | Transcript                    |
|---------|-------------------------------|
| NTRK1   | NTRK1-206 ENST00000524377.7   |
| NTRK2   | NTRK2-201 ENST00000277120.8   |
| NTRK3   | NTRK3-205 ENST00000394480.6   |
| LMNA    | LMNA-205 ENST00000368300.9    |
| BCAN    | BCAN-201 ENST00000329117.10   |
| IRF2BP2 | IRF2BP2-201 ENST00000366609.4 |
| TPM3    | TPM3-224 ENST00000651641.1    |
| BCR     | BCR-201 ENST00000305877.13    |
| SQSTM1  | SQSTM1-202 ENST00000389805.9  |
| ETV6    | ETV6-202 ENST00000396373.9    |
| EML4    | EML4-201 ENST00000318522.10   |
